# Supplementary material for: Triboelectric nanogenerator based on electrospun molecular ferroelectric composite nanofibers for energy harvesting
Source: Royal Society of Chemistry journal article supplement (doi:10.1039/d4lp00024b), 2024-01-01
Supplement: d4lp00024b1.pdf [file d4lp00024b1.pdf]

## Supporting Information

### **Triboelectric nanogenerator based on electrospun molecular ferroelectric composite nanofibers for energy harvesting**

*Swati Deswal,<sup>a</sup> Shima Arab<sup>a</sup> Nanfei He<sup>b</sup> Wei Gao<sup>b</sup> Bongmook Lee<sup>a,c</sup> and Veena Misra<sup>\*a</sup>*

<sup>a</sup>*Department of Electrical and Computer Engineering, North Carolina State University, Raleigh, NC, USA.*

<sup>b</sup>*Department of Textile Engineering, Chemistry and Science, North Carolina State University, Raleigh, NC, 27606, USA.*

<sup>c</sup>*College of Engineering, SUNY Polytechnic Institute, Utica, NY, USA*

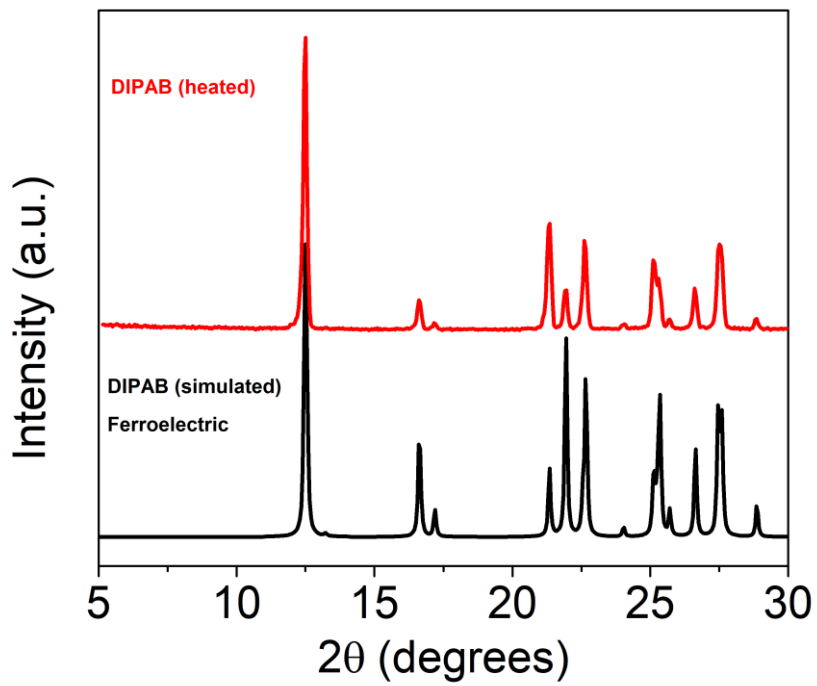

**Fig. S1.** The PXRD pattern of DIPAB after heat treatment.

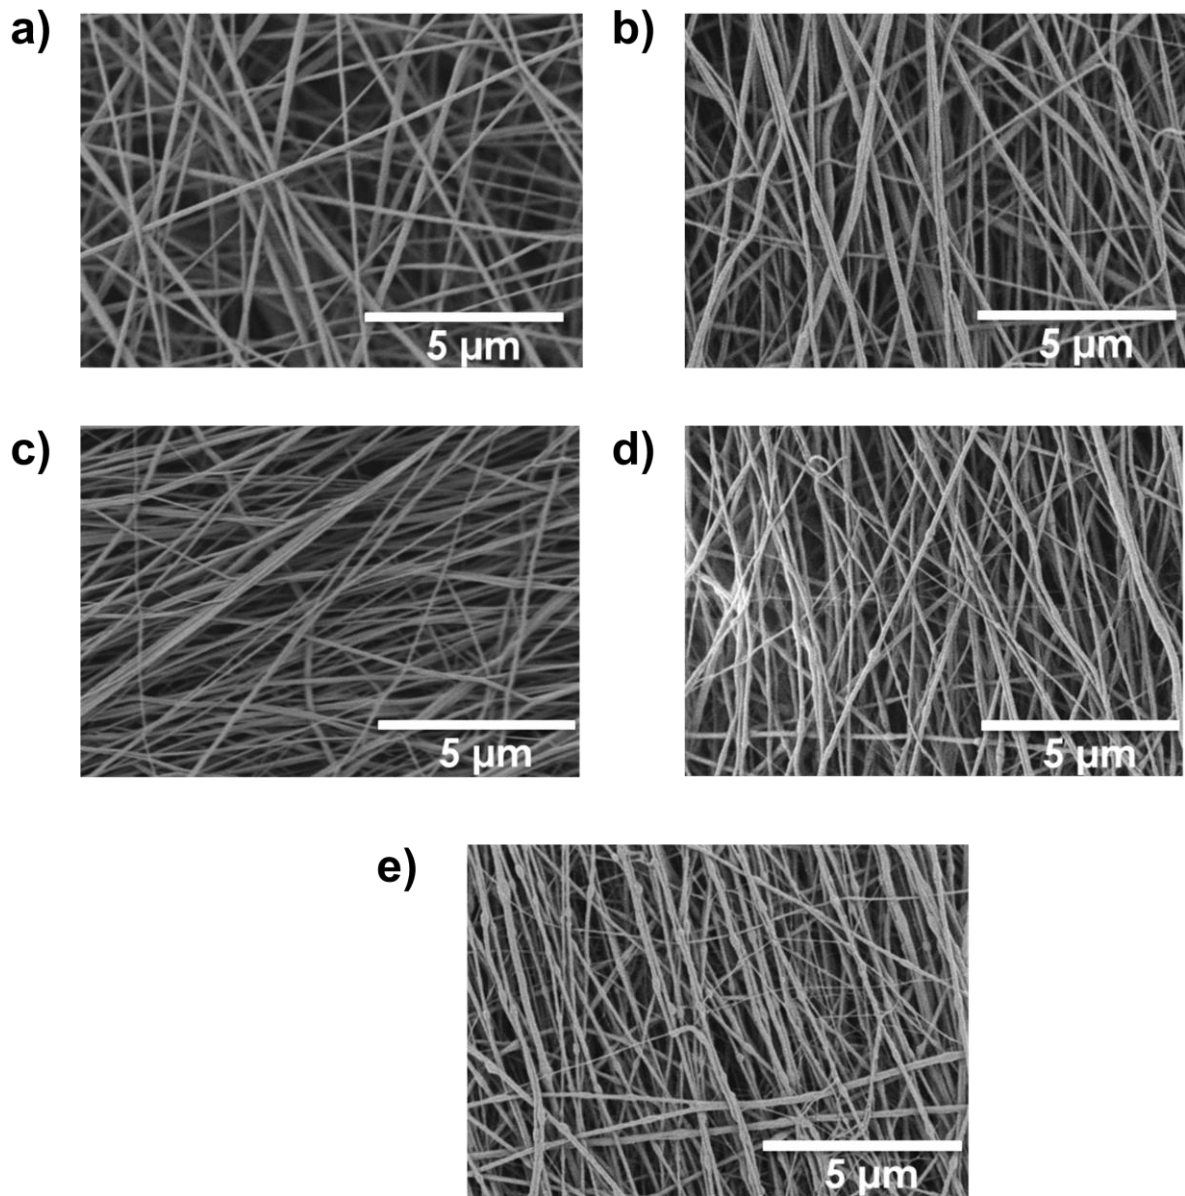

**Fig. S2.** SEM images of (a) P(VDF-TrFE), (b) 3 wt% (c) 5 wt% (d) 10 wt% and (e) 15 wt% DIPAB/P(VDF-TrFE) fibers.

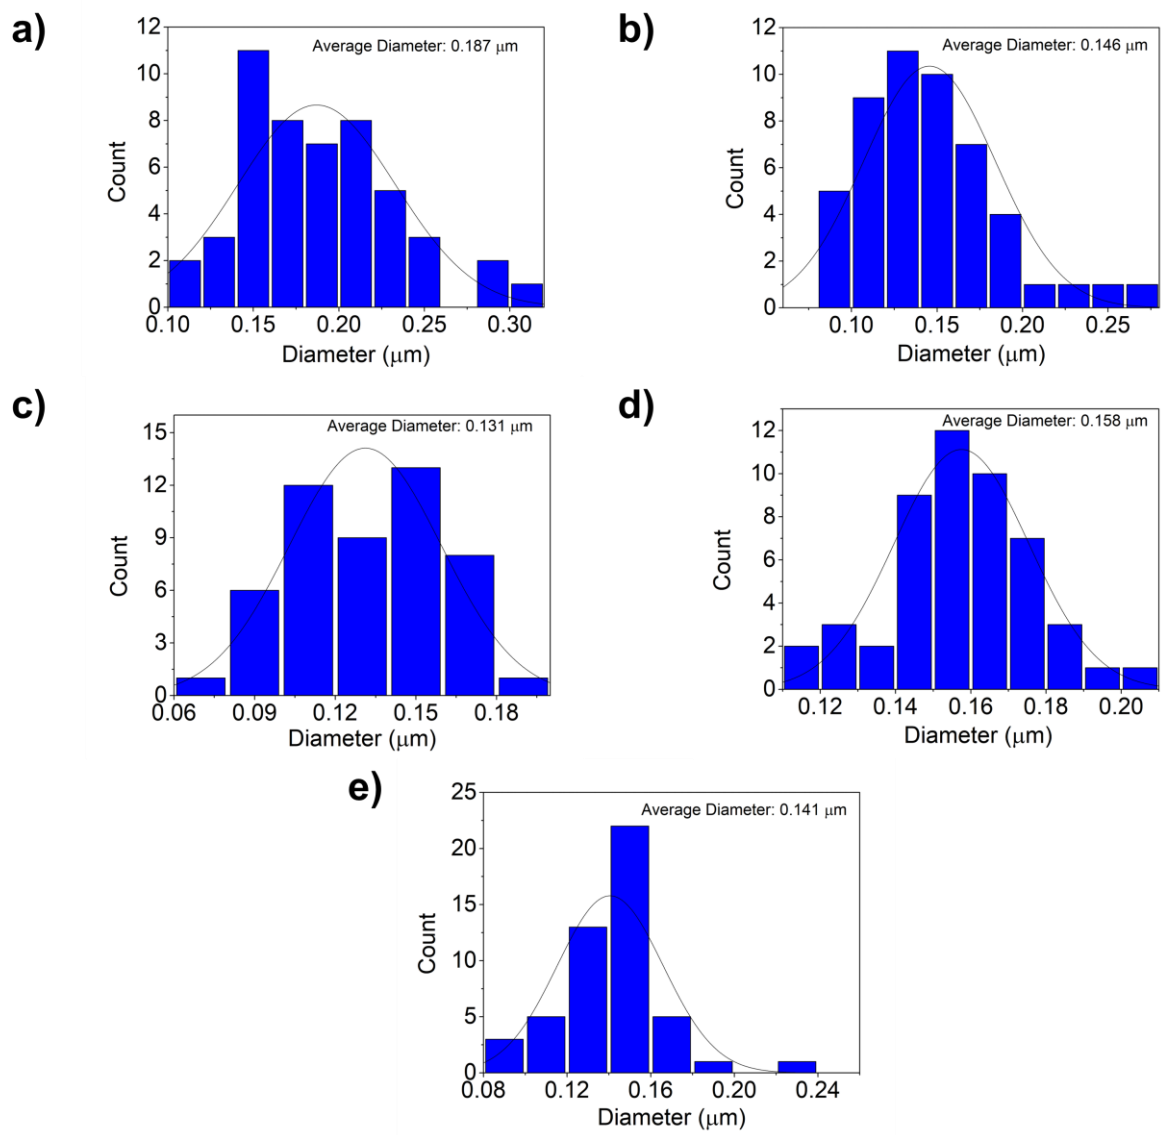

**Fig. S3.** Fiber diameter distributions of (a) P(VDF-TrFE), (b) 3 wt% (c) 5 wt% (d) 10 wt% and (e) 15 wt% DIPAB/P(VDF-TrFE) electrospun mats.

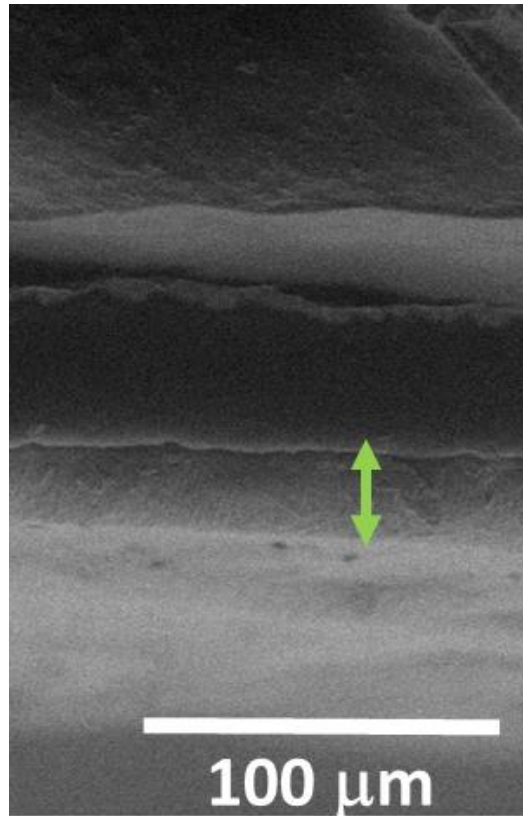

**Fig. S4.** Cross-section SEM image of 5 wt% DIPAB/P(VDF-TrFE) fiber mat showcasing formation of 23  $\mu\text{m}$  thick film.

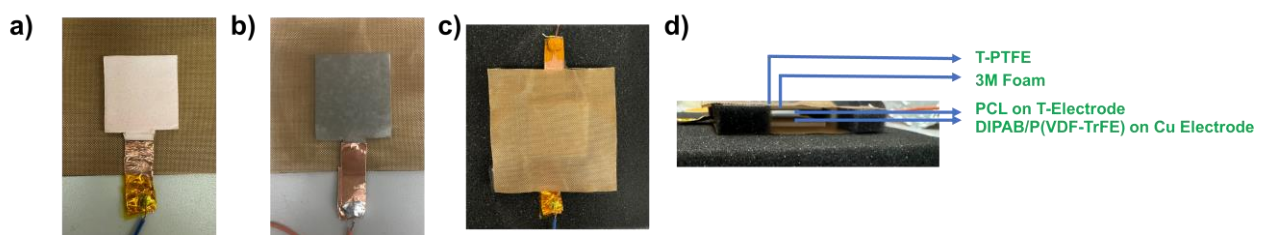

**Fig. S5.** Construction of DIPAB/P(VDF-TrFE) fiber mat device using (a) varied wt% DIPAB/P(VDF-TrFE) fiber mat as negative layers and (b) PCL film as a positive layer. (c),(d) Photograph of the fabricated device.

**Table S1.** Table comparing our TENG device with reported ferroelectric devices.

| Active Layers                                                            | Voltage (V)  | Power density (mW/m <sup>2</sup> ) | References       |
|--------------------------------------------------------------------------|--------------|------------------------------------|------------------|
| BaTiO <sub>3</sub> /PDMS and Nylon cloth                                 | 72.2         | 55                                 | [1]              |
| BaTiO <sub>3</sub> /PVA and PDMS                                         | 72           | 70 $\mu$ W                         | [2]              |
| Bi <sub>2</sub> WO <sub>6</sub> /PVDF-TrFE and Cu                        | 205          | -                                  | [3]              |
| ZnAl-LDH/ PVDF                                                           | 230.6        | 4300                               | [4]              |
| ZnO/PVDF and PTFE                                                        | 80           | 245                                | [5]              |
| BCZTBH/PDMS and Al                                                       | 300          | 157                                | [6]              |
| CA/PEI(b) and Gelatin/ImClO <sub>4</sub> /Ti <sub>3</sub> C <sub>2</sub> | 300          | 5000                               | [7]              |
| CS/- $\gamma$ -gly and PTFE                                              | 79           | 790                                | [8]              |
| SF/15% $\gamma$ -gly and PTFE                                            | 80           | 228                                | [9]              |
| <b>DIPAB/P(VDF-TrFE) and PCL</b>                                         | <b>203.8</b> | <b>416.2</b>                       | <b>This work</b> |

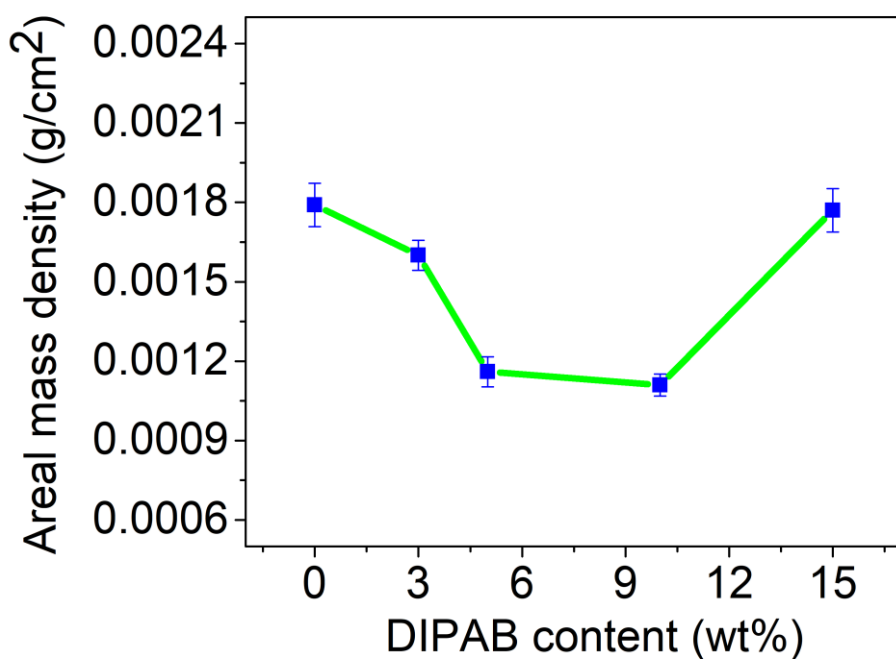

**Fig. S6.** Areal mass density of all wt% DIPAB/P(VDF-TrFE) fiber mats.

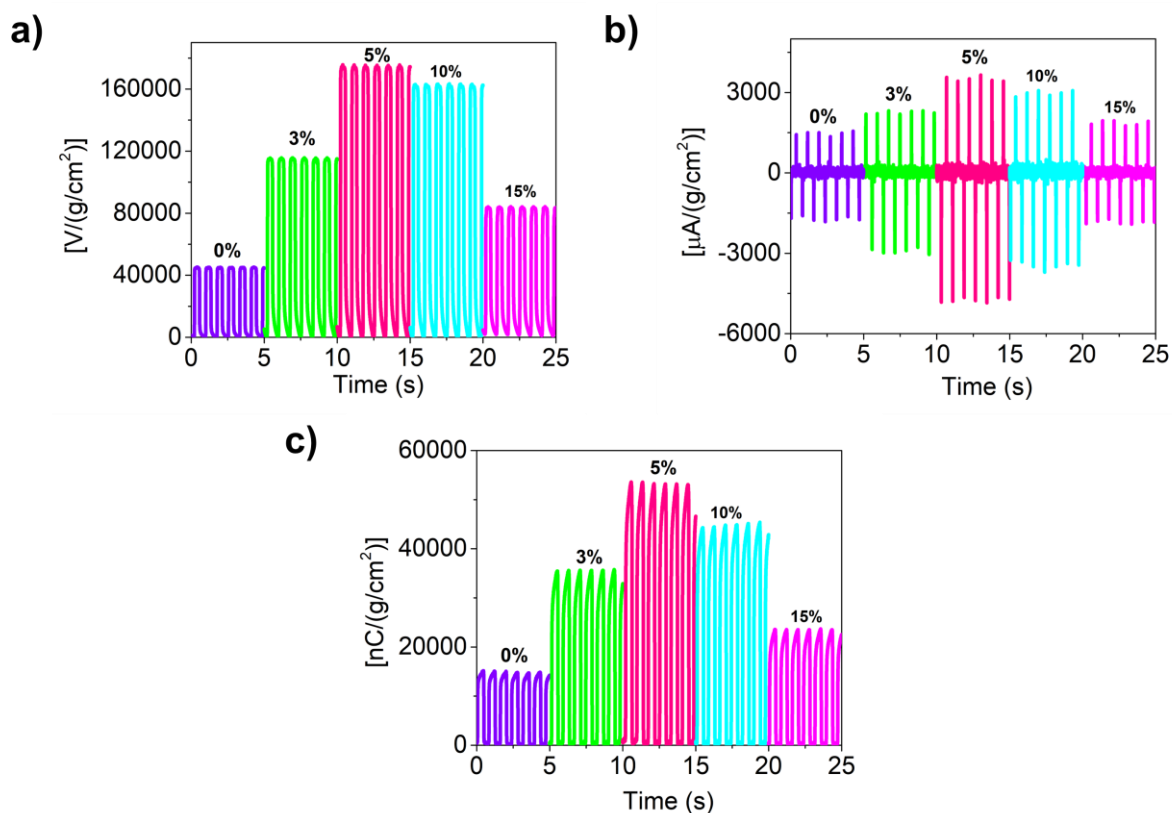

**Fig. S7.** Comparative (a) output voltage, (b) current performance and (c) charge profile of all wt% DIPAB/P(VDF-TrFE) fiber-based devices normalized by areal mass density.

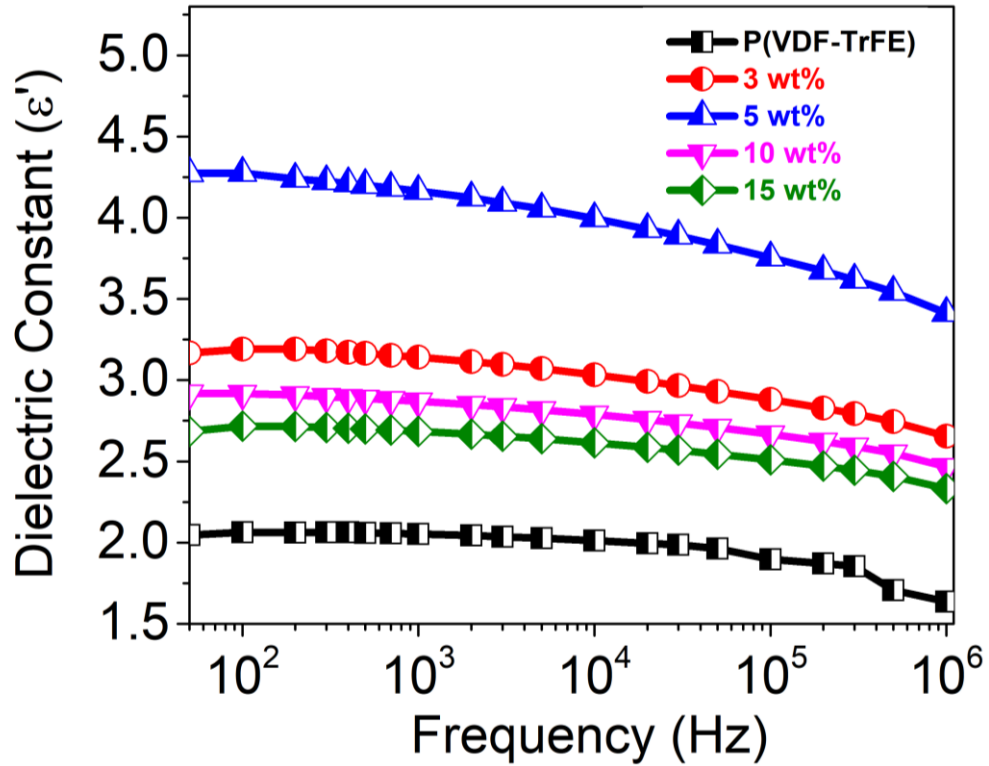

Fig. S8. Frequency-dependent dielectric constant ( $\epsilon'$ ) of DIPAB/P(VDF-TrFE) fiber mats at room temperature.

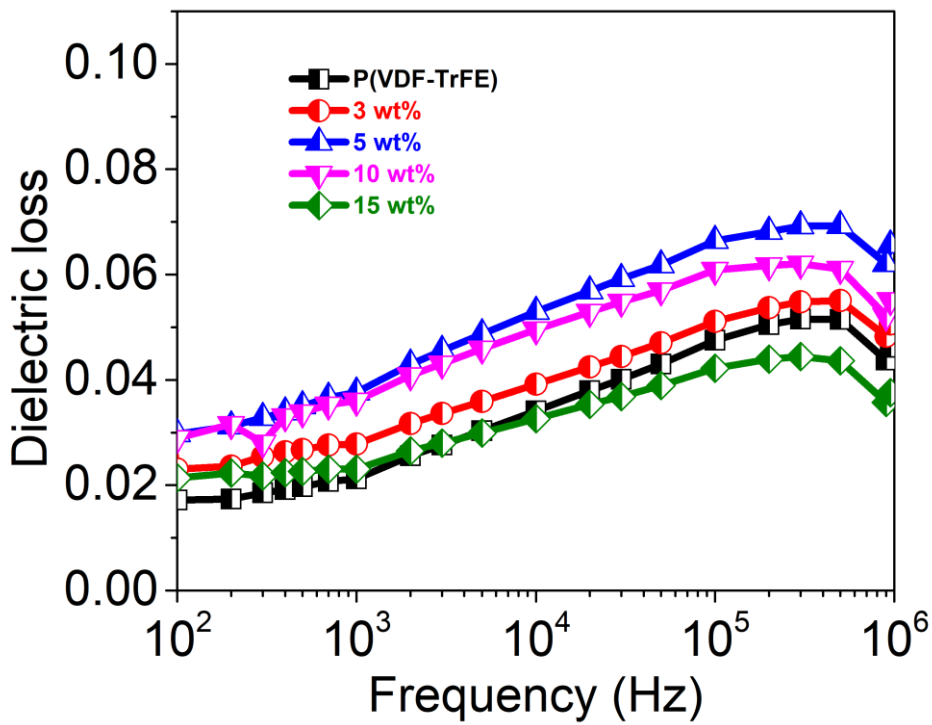

Fig. S9. Frequency-dependent dielectric loss plot of DIPAB/P(VDF-TrFE) fiber mats at room temperature.



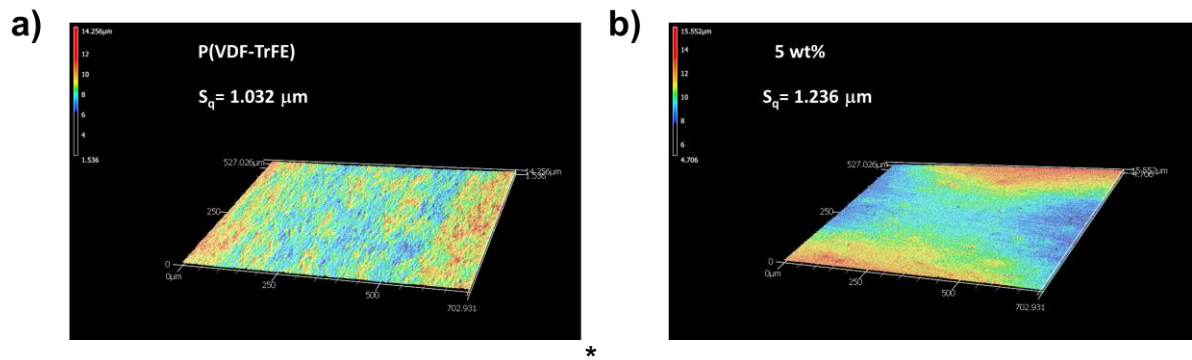

Fig. S10. 3D images of a) P(VDF-TrFE) and (b) 5 wt% DIPAB/P(VDF-TrFE) fiber mats.

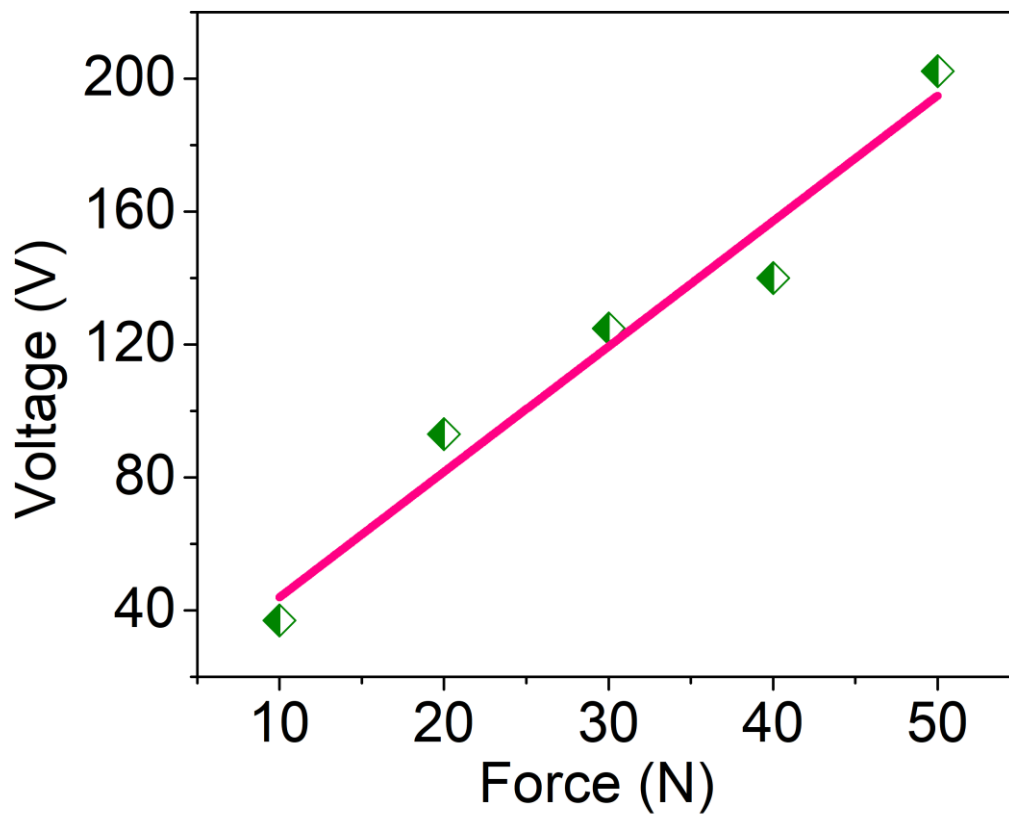

Fig. S11. Linear plot for the variation in voltage with the applied force on 5 wt% DIPAB/P(VDF-TrFE) fiber-based device.

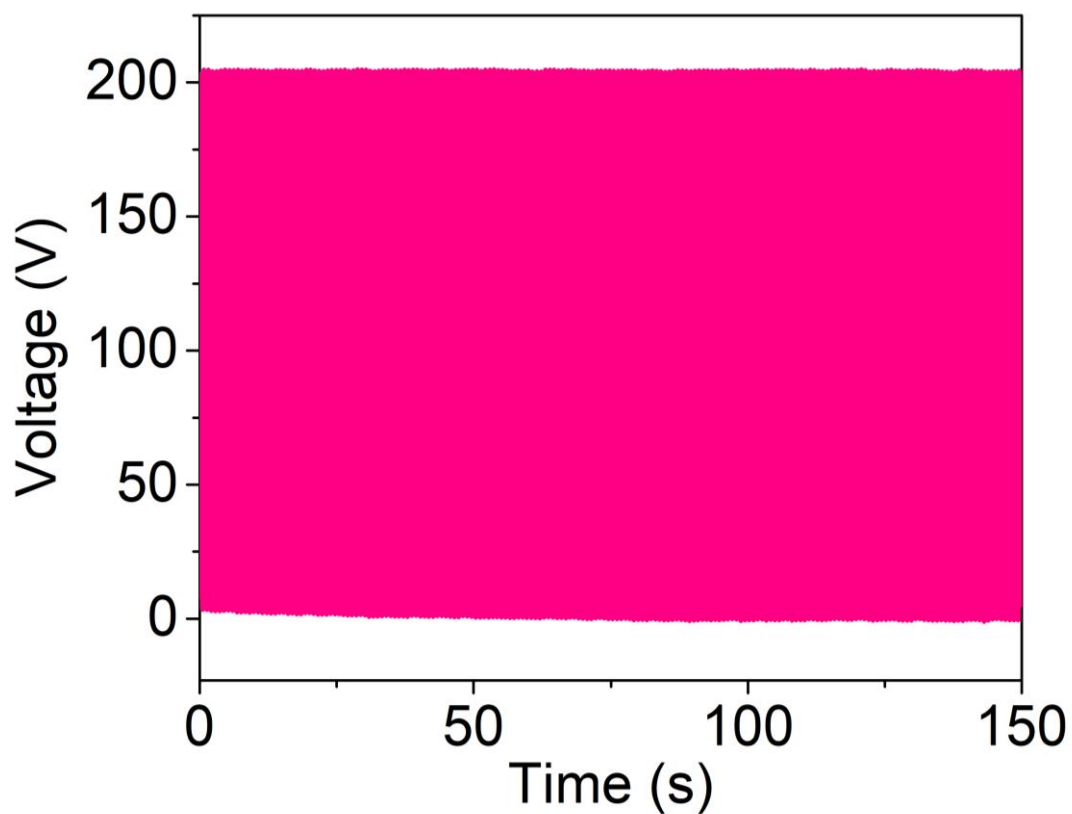

Fig. S12. Mechanical durability test performed on 5 wt% DIPAB/P(VDF-TrFE) fiber-based device.

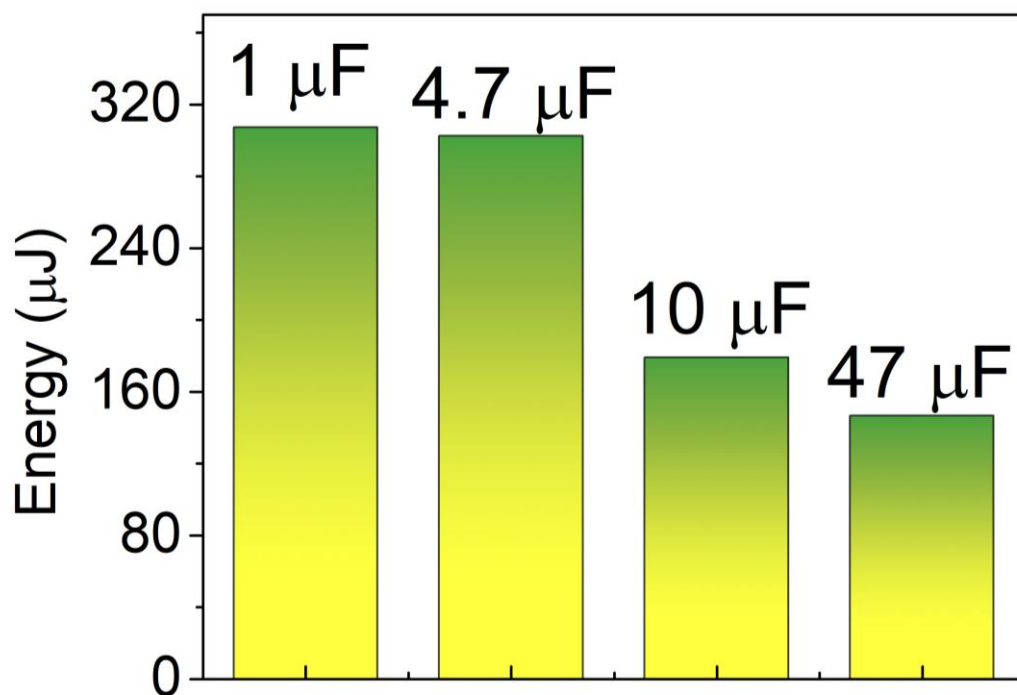

Fig. S13. Electrical energy stored across (a) 1, (b) 4.7, (c) 10 and (d) 47 μF capacitors employing the 5 wt% DIPAB/P(VDF-TrFE) fiber based device.

## References:

1. P. Zhang, W. Zhang, L. Deng and H. Zhang, *Nano Energy*, 2021, **87**, 106176.
2. P. Zhang, Z. Li and H. Zhang, *Smart Materials and Structures*, 2023, **32**, 055017.
3. D. K. Bharti, S. Veeralingam and S. Badhulika, *Materials Horizons*, 2022, **9**, 663-674.
4. S. Ippili, V. Jella, A. M. Thomas, C. Yoon, J.-S. Jung and S.-G. Yoon, *Journal of Materials Chemistry A*, 2021, **9**, 15993-16005.
5. H. H. Singh and N. Khare, *Nano Energy*, 2018, **51**, 216-222.
6. M. Sahu, V. Vivekananthan, S. Hajra, A. K S, N. P. Maria Joseph Raj and S.-J. Kim, *Journal of Materials Chemistry A*, 2020, **8**, 22257-22268.
7. V. A. Cao, M. Kim, P. Cao Van, J.-R. Jeong, S. Y. Kim and J. Nah, *Journal of Materials Chemistry A*, 2024, **12**, 3142-3150.
8. S. Ukasi, P. Jutapukti, C. Ninthub, N. Pinpru, P. Pakawanit, W. Vittayakorn, S. Pongampai, N. Vittayakorn and T. Charoonsuk, *Nano Energy*, 2024, **119**, 109045.
9. N. Suktep, S. Pongampai, P. Pakawanit, J. Noisak, T. Bongkarn, T. Charoonsuk and N. Vittayakorn, *Integrated Ferroelectrics*, 2023, **238**, 101-114.
